# Supplementary material for: Remote Sensing of Chlorophyll-A in Clear vs. Turbid Waters in Lakes
Source: Preprints.org preprint supplement (doi:10.20944/preprints202408.0962.v1), 2024-08-14
Supplement: Supplementary file 1 [file supplementary]

## Supplementary Material for

### Remote sensing of chlorophyll-a in clear vs. turbid waters in large lakes

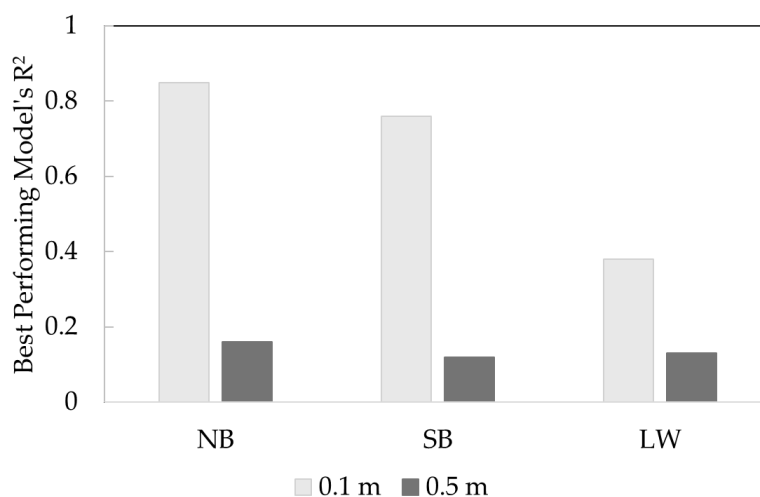

**Figure S1.** Best performing models'  $R^2$  using *in situ* matchups from different depth are shown as light grey (0.1 m) and dark grey bars (0.5 m). Increase in the depth of *in situ* matchups from 0.1 to 0.5m reduces  $R^2$  to about 5 times.

**Table S1.** Best calibration results for each tested Chl-*a* retrieval model. Values show the highest  $R^2$  for each Chl-*a* retrieval model among the 12 sets of matchups for different temporal (0 to  $\pm 3$  days) and spatial windows (1 $\times$ 1, 3 $\times$ 3, and 5 $\times$ 5 pixels) for NB-specific and SB-specific, and LW-specific matchups. Calibrations with no significant correlation between in situ and modeled chl-*a* ( $p > 0.05$ ) were shown as dash.

| Band math                   | NB-Specific | SB-Specific | LW-Specific |
|-----------------------------|-------------|-------------|-------------|
| B <sup>1</sup>              | -           | -           | -           |
| G <sup>2</sup>              | 0.24        | -           | -           |
| R <sup>3</sup>              | -           | 0.26        | -           |
| NIR                         | -           | 0.21        | -           |
| B/G <sup>4</sup>            | 0.82        | -           | 0.33        |
| B/R <sup>6=5</sup>          | 0.24        | 0.45        | -           |
| B/NIR                       | -           | 0.24        | -           |
| G/B <sup>6</sup>            | 0.85        | -           | 0.38        |
| G/R <sup>7</sup>            | -           | 0.75        | -           |
| G/NIR                       | -           | 0.20        | 0.25        |
| R/B <sup>8</sup>            | 0.29        | 0.42        | -           |
| R/G <sup>9</sup>            | -           | 0.76        | -           |
| R/NIR <sup>10</sup>         | -           | -           | -           |
| NIR/B <sup>11</sup>         | -           | 0.25        | -           |
| NIR/G                       | -           | 0.22        | 0.24        |
| NIR/R <sup>12</sup>         | -           | -           | -           |
| B $\times$ G                | -           | -           | -           |
| B $\times$ R                | -           | -           | -           |
| B $\times$ NIR              | -           | -           | -           |
| G $\times$ R                | 0.18        | -           | -           |
| G $\times$ NIR              | -           | -           | -           |
| R $\times$ NIR              | -           | 0.26        | -           |
| Avg(R;NIR)                  | -           | 0.25        | -           |
| B $\times$ R $\times$ NIR   | -           | 0.20        | -           |
| Ave(G;R)                    | 0.19        | -           | -           |
| Ave(B;R)                    | -           | -           | -           |
| (R/B) $\times$ NIR          | -           | 0.33        | -           |
| (G/R) $\times$ NIR          | -           | -           | -           |
| (R/G) $\times$ NIR          | -           | 0.32        | -           |
| (B $\times$ G $\times$ R)   | -           | -           | -           |
| (B $\times$ G $\times$ NIR) | -           | -           | -           |
| (G $\times$ R $\times$ NIR) | -           | 0.22        | -           |

| Band math                         | NB-Specific | SB-Specific | LW-Specific |
|-----------------------------------|-------------|-------------|-------------|
| Ave(B;G)                          | -           | -           | -           |
| Ave(B;NIR)                        | -           | -           | -           |
| Ave(G;NIR)                        | -           | -           | -           |
| (B/R)×NIR                         | -           | -           | -           |
| $((1/B)-(1/G)) \times \text{NIR}$ | 0.82        | -           | 0.29        |
| $((1/R)-(1/G)) \times \text{NIR}$ | -           | 0.74        | 0.27        |
| $((1/R)-(1/B)) \times \text{NIR}$ | 0.26        | 0.43        | -           |
| NDVI <sup>13</sup>                | -           | -           | -           |
| NRVI <sup>14</sup>                | -           | -           | -           |
| (B-R)×G                           | 0.44        | 0.45        | -           |
| SABI <sup>15</sup>                | -           | -           | -           |
| KIVU <sup>16</sup>                | 0.43        | 0.44        | -           |
| Kab1 <sup>17</sup>                | -           | -           | 0.37        |

(1) Ritchie et al (1990); (2) Lathrop & Lillesand (1986); Östlund et al (2001); (3) Tyler et al (2006); Allan et al (2011); Allan et al (2015); (4) Sudheer et al (2006); (5) Han & Jordan (2005); (6) Doxaran et al (2009); (7) Hellweger et al (2004); (8) Sass et al (2007); (9) Floricioiu et al (2004); (10) Strmbech et al (2004); (11) Tebbs et al (2013); (12) Duan et al (2007); (13) Normalized Difference Vegetation Index (NDVI) =  $((\text{NIR}-R)/(\text{NIR}+R))$  in Mishra & Mishra (2012); (14) Normalized Ratio Vegetation Index (NRVI) =  $((R/\text{NIR})-1)/((R/\text{NIR})+1)$  in Zhengjun et al (2008); (15) Surface Algal Bloom Index (SABI) =  $(\text{NIR}-R)/(B+G)$  in Alawadi (2010); (16) 3BDA-like (KIVU) =  $(B-R)/G$  in Brivio et al (2001); (17) Kab1 =  $1.67-3.94 \times \ln(B)+3.78 \times \ln(G)$  in Kabbara et al (2008).

**Table S2.** Calibration and validation results for the NB-scale Best Performing Models (BPMs) for different spatial and temporal windows. The values are average of the 5 cross validation folds. Calibrations with no significant correlation between *in situ* and modeled chl-*a* ( $p > 0.05$ ) were shown as dash.

|              |         | Model                                   | Calibration<br>R <sup>2</sup> | RMSE<br>(µg L <sup>-1</sup> ) | RMSLE<br>(µg L <sup>-1</sup> ) | NRMSE | MAE<br>(µg L <sup>-1</sup> ) | MAPE<br>(%) | Bias  |
|--------------|---------|-----------------------------------------|-------------------------------|-------------------------------|--------------------------------|-------|------------------------------|-------------|-------|
| <b>1 × 1</b> | 0 day   | -                                       | -                             | -                             | -                              | -     | -                            | -           | -     |
|              | ±1 day  | G/B                                     | 0.85                          | 31.94                         | 0.74                           | 1.98  | 22.81                        | 67.72       | 9.39  |
|              | ±2 days | (B <sup>-1</sup> -G <sup>-1</sup> )×NIR | 0.75                          | 20.86                         | 0.61                           | 0.73  | 13.57                        | 50.44       | 2.04  |
|              | ±3 days | (B <sup>-1</sup> -G <sup>-1</sup> )×NIR | 0.57                          | 23.37                         | 0.72                           | 0.88  | 14.48                        | 38.68       | 7.25  |
| <b>3 × 3</b> | 0 day   | -                                       | -                             | -                             | -                              | -     | -                            | -           | -     |
|              | ±1 day  | G/B                                     | 0.70                          | 46.11                         | 0.99                           | 3.11  | 32.66                        | 115.39      | 9.81  |
|              | ±2 days | G/B                                     | 0.66                          | 23.93                         | 0.72                           | 0.71  | 16.49                        | 43.11       | 0.37  |
|              | ±3 days | (B <sup>-1</sup> -G <sup>-1</sup> )×NIR | 0.61                          | 33.41                         | 0.75                           | 1.01  | 21.72                        | 34.21       | -3.89 |
| <b>5 × 5</b> | 0 day   | -                                       | -                             | -                             | -                              | -     | -                            | -           | -     |
|              | ±1 day  | G/B                                     | 0.60                          | 67.06                         | 1.26                           | 6.66  | 48.02                        | 139.09      | -5.86 |
|              | ±2 days | (B <sup>-1</sup> -G <sup>-1</sup> )×NIR | 0.58                          | 39.81                         | 0.78                           | 0.95  | 26.06                        | 65.33       | -8.69 |
|              | ±3 days | (B <sup>-1</sup> -G <sup>-1</sup> )×NIR | 0.55                          | 34.30                         | 0.78                           | 1.02  | 19.10                        | 36.12       | -1.35 |

**Table S3.** Calibration and validation results for the SB-scale Best Performing Models (BPMs) for different spatial and temporal windows. The values are average of the 5 cross validation folds. Calibrations with no significant correlation between *in situ* and modeled chl-*a* ( $p > 0.05$ ) were shown as dash.

|              |         | Model                                   | Calibration<br>R <sup>2</sup> | RMSE<br>(µg L <sup>-1</sup> ) | RMSLE<br>(µg L <sup>-1</sup> ) | NRMSE | MAE<br>(µg L <sup>-1</sup> ) | MAPE<br>(%) | Bias  |
|--------------|---------|-----------------------------------------|-------------------------------|-------------------------------|--------------------------------|-------|------------------------------|-------------|-------|
| <b>1 × 1</b> | 0 day   | -                                       | -                             | -                             | -                              | -     | -                            | -           | -     |
|              | ±1 day  | R/G                                     | 0.76                          | 0.99                          | 0.17                           | 0.23  | 0.91                         | 20.01       | 0.25  |
|              | ±2 days | R/G                                     | 0.62                          | 1.14                          | 0.20                           | 0.24  | 1                            | 22.81       | 0.23  |
|              | ±3 days | (R <sup>-1</sup> -G <sup>-1</sup> )×NIR | 0.32                          | -                             | -                              | -     | -                            | -           | -     |
| <b>3 × 3</b> | 0 day   | -                                       | -                             | -                             | -                              | -     | -                            | -           | -     |
|              | ±1 day  | (R <sup>-1</sup> -G <sup>-1</sup> )×NIR | 0.74                          | 0.59                          | 0.10                           | 0.12  | 0.59                         | 13.56       | 0.44  |
|              | ±2 days | R/G                                     | 0.51                          | 1.22                          | 0.21                           | 0.27  | 1.02                         | 18.55       | -0.08 |
|              | ±3 days | -                                       | -                             | -                             | -                              | -     | -                            | -           | -     |
| <b>5 × 5</b> | 0 day   | -                                       | -                             | -                             | -                              | -     | -                            | -           | -     |
|              | ±1 day  | R/G                                     | 0.63                          | 2.35                          | 0.37                           | 0.35  | 2.35                         | 54.30       | 2.35  |
|              | ±2 days | R/G                                     | 0.63                          | 1.20                          | 0.20                           | 0.26  | 1.02                         | 19.75       | 1     |
|              | ±3 days | -                                       | -                             | -                             | -                              | -     | -                            | -           | -     |

**Table S4.** Calibration and validation results for the LW-scale Best Performing Models (BPMs) for different spatial and temporal windows. The values are average of the 5 cross validation folds. Calibrations with no significant correlation between *in situ* and modeled chl-*a* ( $p > 0.05$ ) were shown as dash.

|       |         | Model | Calibration<br>R <sup>2</sup> | RMSE<br>(µgL <sup>-1</sup> ) | RMSLE<br>(µgL <sup>-1</sup> ) | NRMSE | MAE<br>(µgL <sup>-1</sup> ) | MAPE<br>(%) | Bias |
|-------|---------|-------|-------------------------------|------------------------------|-------------------------------|-------|-----------------------------|-------------|------|
| 1 × 1 | 0 day   | -     | -                             | -                            | -                             | -     | -                           | -           | -    |
|       | ±1 day  | G/B   | 0.38                          | -                            | -                             | -     | -                           | -           | -    |
|       | ±2 days | NIR/G | 0.17                          | -                            | -                             | -     | -                           | -           | -    |
|       | ±3 days | -     | -                             | -                            | -                             | -     | -                           | -           | -    |
| 3 × 3 | 0 day   | -     | -                             | -                            | -                             | -     | -                           | -           | -    |
|       | ±1 day  | G/B   | 0.35                          | -                            | -                             | -     | -                           | -           | -    |
|       | ±2 days | G/R   | 0.21                          | -                            | -                             | -     | -                           | -           | -    |
|       | ±3 days | G/B   | 0.09                          | -                            | -                             | -     | -                           | -           | -    |
| 5 × 5 | 0 day   | -     | -                             | -                            | -                             | -     | -                           | -           | -    |
|       | ±1 day  | G/B   | 0.27                          | -                            | -                             | -     | -                           | -           | -    |
|       | ±2 days | G/R   | 0.29                          | -                            | -                             | -     | -                           | -           | -    |
|       | ±3 days | -     | -                             | -                            | -                             | -     | -                           | -           | -    |

## References

1. Ritchie, J.C.; Cooper, C.M.; Schiebe, F.R. The relationship of MSS and TM digital data with suspended sediments, chlorophyll, and temperature in Moon Lake, Mississippi. *Remote Sens. Environ.* **1990**, *33*(2), 137-148. doi: [https://doi.org/10.1016/0034-4257\(90\)90039-O](https://doi.org/10.1016/0034-4257(90)90039-O).
2. Lathrop, R.G.; Lillesand, T.M. Use of Thematic Mapper data to assess water quality in Green Bay and central Lake Michigan. *PE&RS*, **1986**, *52*(5), 671-680.
3. Östlund, C.; Flink, P.; Strömbeck, N.; Pierson, D.; Lindell, T. Mapping of the water quality of Lake Erken, Sweden, from imaging spectrometry and Landsat Thematic Mapper. *Sci. Total Environ.*, **2001**, *268*(1-3), 139-154. doi: [https://doi.org/10.1016/S0048-9697\(00\)00683-5](https://doi.org/10.1016/S0048-9697(00)00683-5).
4. Tyler, A.N.; Svab, E.; Preston, T.; Présing, M.; Kovács, W.A. Remote sensing of the water quality of shallow lakes: A mixture modelling approach to quantifying phytoplankton in water characterized by high-suspended sediment. *Int. J. of Remote Sens.* **2006**, *27*(8), 1521-1537. doi: <https://doi.org/10.1080/01431160500419311>.
5. Allan, M.G.; Hamilton, D.P.; Hicks, B.J.; Brabyn, L. 2011. Landsat remote sensing of chlorophyll a concentrations in central North Island lakes of New Zealand. *Int. J. Remote Sens.* **2011**, *32*(7), 2037-2055. doi: <https://doi.org/10.1080/01431161003645840>.
6. Allan, M.G.; Hamilton, D.P.; Hicks, B.; Brabyn, L. Empirical and semi-analytical chlorophyll a algorithms for multi-temporal monitoring of New Zealand lakes using Landsat. *Environ. Monit. Assess.* **2015**, *187*, 1-24. doi: <https://doi.org/10.1007/s10661-015-4585-4>.
7. Sudheer, K.P.; Chaubey, I.; Garg, V. Lake water quality assessment from landsat thematic mapper data using neural network: an approach to optimal band combination selection1. *J. Am. Water Resour. Assoc.* **2006**, *42*(6), 1683-1695. doi: <https://doi.org/10.1111/j.1752-1688.2006.tb06029.x>.
8. Han, L.; Jordan, K.J. Estimating and mapping chlorophyll-a concentration in Pensacola Bay, Florida using Landsat ETM+ data. *Int. J. Remote Sens.* **2005**, *26*(23), 5245-5254. doi: <https://doi.org/10.1080/01431160500219182>.
9. Doxaran, D.; Froidefond, J.M.; Castaing, P.; Babin, M. Dynamics of the turbidity maximum zone in a macrotidal estuary (the Gironde, France): Observations from field and MODIS satellite data. *Estuar. Coast. Shelf Sci.* **2009**, *81*(3), 321-332. doi: <https://doi.org/10.1016/j.ecss.2008.11.013>.
10. Hellweger, F.L.; Miller, W.; Oshodi, K.S. Mapping turbidity in the Charles River, Boston using a high-resolution satellite. *Environ. Monit. Assess.* **2007**, *132*, 311-320. doi: <https://doi.org/10.1007/s10661-006-9535-8>.
11. Sass, G.Z.; Creed, I.F.; Bayley, S.E.; Devito, K.J. Understanding variation in trophic status of lakes on the Boreal Plain: A 20-year retrospective using Landsat TM imagery. *Remote Sens. Environ.* **2007**, *109*(2), 127-141, doi: 10.1016/j.rse.2006.12.010.
12. Floricioiu, D.; Rott, H.; Rott, E.; Dokulil, M.; Defrancesco, C. 2003. Retrieval of limnological parameters of perialpine lakes by means of MERIS data. In Proceedings of

the **2004** Envisat & ERS Symposium (ESA SP-572), 6–10 September 2004, Salzburg, Austria, pp. 1–5 (Paris: ESA).

13. Strömbeck, N.; Candiani, G.; Giardino, C.; Zilioli, E. Water quality monitoring of Lake Garda using multi-temporal MERIS data. In Proceedings of MERIS User Workshop (ESA SP-549), 10–13 November **2003**, Frascati, Italy, p. 17.1 (Paris: ESA).
14. Tebbs, E.J.; Remedios, J.J.; Harper, D.M. (2013). Remote sensing of chlorophyll-a as a measure of cyanobacterial biomass in Lake Bogoria, a hypertrophic, saline- alkaline, flamingo lake, using Landsat ETM. *Remote Sens. Environ.* **2013**, 135, 92-106. doi:10.1016/j.rse.2013.03.024.
15. Duan, H.; Zhang, Y.; Zhang, B.; Song, K.; Wang, Z. Assessment of chlorophyll-a concentration and trophic state for Lake Chagan using Landsat TM and field spectral data. *Environ. Monit. Assess.* **2007**, 129(1), 295- 308. doi:10.1007/s10661-006-9362-y
16. Mishra, S.; Mishra, D.R. Normalized difference chlorophyll index: A novel model for remote estimation of chlorophyll-a concentration in turbid productive waters. *Remote Sens Environ* **2012**, 117, 394-406. doi: 10.1016/j.rse.2011.10.016.
17. Zhengjun, W.; Jianming, H.; Guisen, D. Use of satellite imagery to assess the trophic state of Miyun Reservoir, Beijing, China. *Environ. Pollut.* **2008**, 155(1), 13-19. doi: <https://doi.org/10.1016/j.envpol.2007.11.003>.
18. Alawadi, F. Detection of surface algal blooms using the newly developed algorithm surface algal bloom index (SABI). In Remote Sensing of the Ocean, Sea Ice, and Large Water Regions **2010** (Vol. 7825, p. 782506). International Society for Optics and Photonics. doi: <https://doi.org/10.1117/12.862096>.
19. Brivio, P.A.; Giardino, C.; Zilioli, E. 2001. Determination of chlorophyll concentration changes in Lake Garda using an image-based radiative transfer code for Landsat TM images. *Int. J. Remote Sens.* **2001**, 22(2-3), 487-502. doi: <https://doi.org/10.1080/014311601450059>.
20. Kabbara, N.; Benkhelil, J.; Awad, M.; Barale, V. Monitoring water quality in the coastal area of Tripoli (Lebanon) using high-resolution satellite data. *ISPRS J. Photogramm. Remote Sens.* **2008**, 63(5), 488-495. doi: <https://doi.org/10.1016/j.isprsjprs.2008.01.004>.



```
// =====
// DSWE 2.0 Monthly Composites
// =====
// This script creates monthly composites of Dynamic Surface Water Extent (DSWE) v2.0
products:
// categories of ground surface inundation as detected in cloud-/shadow-/snow-free
// Landsat pixels. Where multiple values are returned for pixels within a month,
// higher-confidence water categories take precedence over lower/partial ones, while water
// or no-water categories dominate cloudy pixels. Algorithm and approach were originally
// derived from JJones's 2015 DSWE Algorithm Description pdf and updated to match changes
in
// June 2018 DSWE v2.0 documentation.
// -----
// DSWE coding: Jessica J. Walker, Roy E. Petrakis, Christopher E. Soulard
// -----
// Input: User-supplied date range (within Landsat TM availability)
// Output: Single multi-band image of monthly DSWE composites as a GEE Asset
// -----
// DSWE categories:
// 0 - Not Water
// 1 - Water - High Confidence
// 2 - Water - Moderate Confidence
// 3 - Partial Surface Water Pixel
// 4 - Water or wetland, low confidence
// 9 - Cloud, Cloud Shadow, or Snow (Hillshaded pixels set to 9 instead of 0)
// null - Fill (no data) ** currently left masked
// -----
// Notes:
// This script uses the WGS 84 projection (EPSG:4326)
// -----

// ----- Input user-required info -----
// Import variables (Cambodia shapefile imported as asset for publication)
// Can also import study area or create area in GEE and save as a feature collection
//Var geometry: Table "import extent variable"
// Load DEM file, SRTM used here
```

```

var dem = ee.Image('USGS/SRTMGL1_003') //Image "SRTM Digital Elevation Data 30m"
// Id: USGS/SRTMGL1_003
// Dates should be within Landsat TM range (Aug 22, 1982 to present)
var startdate = ee.Date('1988-01-01');
var enddate = ee.Date('2018-12-31');
// -----
// -----
// Define AOI (var geometry)
var aoi = ee.FeatureCollection(geometry);
// -----
// Load Landsat imagery
// -----
// Define Landsat surface reflectance bands
var sensor_band_dict = ee.Dictionary({
    18 : ee.List([1,2,3,4,5,6,10]),
    17 : ee.List([0,1,2,3,4,6,9]),
    15 : ee.List([0,1,2,3,4,6,9]),
    14 : ee.List([0,1,2,3,4,6,9])
});
// Sensor band names corresponding to selected band numbers
var bandNames = ee.List(['blue','green','red','nir','swir1','swir2','pixel_qa']);
// -----
// Landsat 4 - Data availability Aug 22, 1982 - Dec 14, 1993
var ls4 = ee.ImageCollection('LANDSAT/LT04/C01/T1_SR')
    .filterBounds(aoi.geometry())
    .select(sensor_band_dict.get('14'), bandNames);

// -----
// Landsat 5 - Data availability Jan 1, 1984 - May 5, 2012
var ls5 = ee.ImageCollection('LANDSAT/LT05/C01/T1_SR')
    .filterBounds(aoi.geometry())
    .select(sensor_band_dict.get('15'), bandNames);
// Landsat 7 data are only used during operational SLC and
// to fill the gap between the end of LS5 and the beginning
// of LS8 data collection
// Prior to SLC-off

```

```

// -----
// Landsat 7 - Data availability Jan 1, 1999 - Aug 9, 2016
// SLC-off after 31 May 2003
var ls7 = ee.ImageCollection('LANDSAT/LE07/C01/T1_SR')
    .filterDate('1999-01-01', '2003-05-31')
    .filterBounds(aoi.geometry())
    .select(sensor_band_dict.get('l7'), bandNames);
// Post SLC-off; fill the LS 5 gap
// -----
// Landsat 7 - Data availability Jan 1, 1999 - Aug 9, 2016
// SLC-off after 31 May 2003
var ls7_2 = ee.ImageCollection('LANDSAT/LE07/C01/T1_SR')
    .filterDate('2012-05-05', '2014-04-11')
    .filterBounds(aoi.geometry())
    .select(sensor_band_dict.get('l7'), bandNames);
// -----
// Landsat 8 - Data availability Apr 11, 2014 - present
var ls8 = ee.ImageCollection('LANDSAT/LC08/C01/T1_SR')
    .filterBounds(aoi.geometry())
    .select(sensor_band_dict.get('l8'), bandNames);

// Merge landsat collections
var l4578 = ee.ImageCollection(ls4
    .merge(ls5)
    .merge(ls7)
    .merge(ls7_2)
    .merge(ls8).sort('system:time_start'))
    .filterDate(startdate, enddate);
// -----
// Mask clouds, cloud shadows, and snow
// -----
// https://landsat.usgs.gov/sites/default/files/documents/ledaps\_product\_guide.pdf
function maskClouds(img) {
    var qa = img.select(['pixel_qa']);
    var clouds = qa.bitwiseAnd(8).neq(0).or // Cloud shadow (0 = clear, 1 = contamination)
        (qa.bitwiseAnd(16).neq(0)).or // Snow

```

```

        (qa.bitwiseAnd(32).neq(0)); // Cloud
    return img.addBands(clouds.rename('clouds')); // Add band of contaminated pixels
}
// Apply mask
var img_masked = l4578.map(maskClouds); //.map(function(img){return img.clip(aoi)});
// -----
// Calculate hillshade mask
// -----
function addHillshade(img) {
    var solar_azimuth = img.get('SOLAR_AZIMUTH_ANGLE');
    var solar_zenith = img.get('SOLAR_ZENITH_ANGLE'); // solar altitude = 90-zenith
    var solar_altitude = ee.Number(90).subtract(ee.Number(solar_zenith));
    return img.addBands(ee.Terrain.hillshade(dem, solar_azimuth,
solar_altitude).rename('hillshade'));
}
// Add hillshade bands
var img_hillshade = img_masked.map(addHillshade);
// -----
// Calculate DSWE indices
// -----
function addIndices(img){
// NDVI
    img = img.addBands(img.normalizedDifference(['nir', 'red']).select([0], ['ndvi']));
// MNDWI (Modified Normalized Difference Wetness Index) = (Green - SWIR1) / (Green +
SWIR1)
    img = img.addBands(img.normalizedDifference(['green', 'swir1']).select([0], ['mndwi']));
// MBSRV (Multi-band Spectral Relationship Visible) = Green + Red
    img = img.addBands(img.select('green').add(img.select('red')).select([0], ['mbsrv'])).toFloat();
// MBSRN (Multi-band Spectral Relationship Near-Infrared) = NIR + SWIR1
    img = img.addBands(img.select('nir').add(img.select('swir1')).select([0], ['mbsrn'])).toFloat();
// AWESH (Automated Water Extent Shadow) = Blue + (2.5 * Green) + (-1.5 * mbsrn) + (-0.25 *
SWIR2)
    img = img.addBands(img.expression('blue + (2.5 * green) + (-1.5 * mbsrn) + (-0.25 * swir2)', {
        'blue': img.select('blue'),
        'green': img.select('green'),
        'mbsrn': img.select('mbsrn'),
    }));
}

```

```

        'swir2': img.select('swir2')
    }).select([0], ['awesh'])).toFloat();
    return img;
}
// Add indices
var img_indices = img_hillshade.map(addIndices);
// -----
// DSWE parameter testing
// -----
// Bitmask of 11111 = 16 + 8 + 4 + 2 + 1 = 31 = 1F in hex
// 1. ===== Function: test MNDWI =====
// If (MNDWI > 0.124) set the ones digit (i.e., 00001)
function test_mndwi(img) {
    var mask = img.select('mndwi').gt(0.124);
    return img.addBands(mask
        .bitwiseAnd(0x1F)
        .rename('mndwi_bit'));
}
// 2. ===== Function: compare MBSRV and MBSRN =====
// If (MBSRV > MBSRN) set the tens digit (i.e., 00010)
function test_mbsrv_mbsrn(img) {
    var mask = img.select('mbsrv').gt(img.select('mbsrn'));
    return img.addBands(mask
        .bitwiseAnd(0x1F)
        .leftShift(1) // shift left 1 space
        .rename('mbsrn_bit'));
}
// 3. ===== Function: test AWEsh =====
// If (AWEsh > 0.0) set the hundreds digit (i.e., 00100)
function test_awesh(img) {
    var mask = img.select('awesh').gt(0.0);
    return img.addBands(mask
        .bitwiseAnd(0x1F)
        .leftShift(2) // shift left 2 spaces
        .rename('awesh_bit'));
}

```

```

// 4. ===== Function: test PSW1 =====
// If (MNDWI > -0.44 && SWIR1 < 900 && NIR < 1500 & NDVI < 0.7) set the thousands digit
(i.e., 01000)
function test_mndwi_swir1_nir(img) {
  var mask = img.select('mndwi').gt(-0.44)
    .and(img.select('swir1').lt(900))
    .and(img.select('nir').lt(1500))
    .and(img.select('ndvi').lt(0.7));
  return img.addBands(mask
    .bitwiseAnd(0x1F)
    .leftShift(3) // shift left 3 spaces
    .rename('swir1_bit'));
}

// 5. ===== Function: test PSW2 =====
// If (MNDWI > -0.5 && SWIR1 < 3000 && SWIR2 < 1000 && NIR < 2500 && Blue < 1000) set the
ten-thousands digit (i.e., 10000)
function test_mndwi_swir2_nir(img){
  var mask = img.select('mndwi').gt(-0.5)
    .and(img.select('swir1').lt(3000))
    .and(img.select('swir2').lt(1000))
    .and(img.select('nir').lt(2500))
    .and(img.select('blue').lt(1000));
  return img.addBands(mask
    .bitwiseAnd(0x1F)
    .leftShift(4) // shift left 4 spaces
    .rename('swir2_bit'));
}

// Add all bitwise bands to image collection
img_indices_bit = ee.ImageCollection(img_indices)
  .map(test_mndwi)
  .map(test_mbsrv_mbsrn)
  .map(test_awesh)
  .map(test_mndwi_swir1_nir)
  .map(test_mndwi_swir2_nir);

// Function: consolidate individual bit bands
function sum_bit_bands(img){

```

```

var bands = img.select(['mndwi_bit', 'mbsrn_bit', 'awesh_bit', 'swir1_bit', 'swir2_bit']);
var summed_bands = bands.reduce(ee.Reducer.bitwiseOr());
return img.addBands(summed_bands.rename('summed_bit_band'));
}
// Add individual bit bands to image collection and summarize
var img_indices_bit = ee.ImageCollection(img_indices)
    .map(test_mndwi)
    .map(test_mbsrv_mbsrn)
    .map(test_awesh)
    .map(test_mndwi_swir1_nir)
    .map(test_mndwi_swir2_nir)
    .map(sum_bit_bands);
// -----
// Produce DSWE layers
// -----
// Construct slope image from DEM
//var dem = dem.clip(aoi); // removed clipping in an attempt to speed up script
var slope = ee.Terrain.slope(dem);
// Convert binary code into 4 DSWE categories
var img_indices_all = img_indices_bit.map(function(img){
    var reclass = img.select('summed_bit_band').remap([0, 1, 2, 3, 4, 5, 6, 7, 8, 9,
        10, 11, 12, 13, 14, 15, 16, 17, 18, 19,
        20, 21, 22, 23, 24, 25, 26, 27, 28, 29,
        30, 31],
        [0, 0, 0, 4, 0, 4, 4, 2, 0, 4,
        4, 2, 4, 2, 2, 1, 4, 4, 4, 2,
        4, 2, 2, 1, 3, 2, 2, 1, 2, 1,
        1, 1]).rename('dswe');
// ID cloud-contaminated pixels
    reclass = reclass.where(img.select('clouds').eq(1), 9);
// ID shaded areas
    reclass = reclass.where(img.select('hillshade').lte(110), 8);
// ID slopes
    reclass = reclass.where(img.select('dswe').eq(4) && slope.gte(5.71).or // 10% slope = 5.71°
        (img.select('dswe').eq(3) && slope.gte(11.31)).or // 20% slope = 11.31°

```

```

        (img.select('dswe').eq(2) && slope.gte(16.7)).or      // 30% slope = 16.7°
        (img.select('dswe').eq(1) && slope.gte(16.7)), 0);    // 30% slope = 16.7°

    return img.addBands(reclass).select('dswe');
  });
  // -----
  // Create monthly composites
  // -----
  // Generate sequence of months
  var months_diff = enddate.difference(startdate, 'month'); // # of months between start and end
  var months = ee.List.sequence(0, months_diff.int());
  // Standardize start date to first of that month; i.e., 08-13-2000 --> 08-01-2000
  var start_year = startdate.get('year');
  var start_month = startdate.get('month');
  var start_date = ee.Date.fromYMD(start_year, start_month, 1);
  // Cycle through all months. Using a "min" reducer means that higher-confidence
  // water categories take precedence over lower/partial ones, while water or no-water categories
  // dominate cloudy pixels. Adding an empty band is necessary because GEE triggers
  // an error if an image can't be returned, and in some months there are no
  // images due to the gap between Landsat 5 and 8.
  var dswe_ic = ee.ImageCollection.fromImages(months.map(function(m){
    var start = start_date.advance(m, 'month'); // Advance start date by m months
    var end = start.advance(1, 'month');      // End date is start month +1
    return img_indices_all.filterDate(start, end)
      .select(['dswe'])
      .reduce(ee.Reducer.min()) // Produces band 'dswe_min'
      .set('date', start.format("YYYYMM")) // Sets yr/mo as property 'date'
      .cast({'dswe': 'uint8'}) // Adds empty band 'dswe'
      .remap([0,1,2,3,4,8,9], [0,1,2,3,4,9,9]).rename('dswe'); // remap takes the 1st band unless
    otherwise
      // specified. If 'dswe_min' exists, that's the
      // 1st one. If 'dswe' is the only band, it is
      // converted to the same type as true min bands
      // but is empty. In either case, a band is
      // produced.
  }));

```



```

// -----
// Transform image collection to multi-band image for output
// -----
function appendBand(current, previous){
  // Build a name for the band (here, "dswe_YYYYMM")
  var bandName =
ee.Algorithms.String(current.bandNames().get(0)).cat('_').cat(current.get('date'));
  // Rename the band
  current = current.select([0], [bandName]);
  // Append it to the result (only returns current item on first element/iteration)
  var accum = ee.Algorithms.If(ee.Algorithms.IsEqual(previous, null), current,
current.addBands(ee.Image(previous)));
  // Return the accumulation
  return accum;
}
// Iterate through the image collection
var dswe_i = ee.Image(dswe_ic.iterate(appendBand));
// -----
// Export image
// -----
Export.image.toDrive({
  image: dswe_i,
  description: 'DSWE2_1988_2018_Cambodia',
  scale: 30,
  crs: 'EPSG:4326', // WGS 84
  maxPixels: 1e13,
  region: aoi.geometry().bounds(),
});
// -----
// Visualization of DSWE Image Products
// -----
// Center on polygon
Map.centerObject(aoi, 10);
Map.addLayer(aoi, {}, 'aoi');
// Viz parameters: classes: 0, 1, 2, 3, 4, 9

```

```

var dswe_viz = {min:0, max: 9, palette: ['000000', '002ba1', '6287ec', '77b800', 'c1bdb6', '000000',
'000000',
                                '000000', '000000', 'ffffff']};
var ls_viz = {bands: [ 'red', 'green', 'blue'], min:0, max:3000, gamma: [0.95, 1.1, 1]};
//var dswe_ic_firstImage = ee.Image(dswe_ic.first());
//Map.addLayer(dswe_ic_firstImage, dswe_viz_params_all, 'dswe_ic_firstImage');

// DSWE image (not composited)
Map.addLayer(ee.Image(img_indices_all.select('dswe').first()), dswe_viz, "DSWE");
// DSWE monthly composite image (from image collection)
Map.addLayer(dswe_ic.first().select('dswe'), dswe_viz, "DSWE composite");
// Landsat Data
Map.addLayer(ee.Image(img_indices.first()), ls_viz, 'Landsat');

```
